# Supplementary material for: Characterization and Preliminary Safety Evaluation of Akkermansia muciniphila PROBIO
Source: MDPI journal article supplement (doi:10.3390/foods13030442), 2024-01-30
Supplement: s1 [file s1]

**Table S1.** Two genes related to the potential drug resistance of *A. muciniphila* PROBIO detected based on the CARD database.

| ORF_ID                | Cut_off | Best_hit_bitscore | Best_hit_ARO        | Best_identities | ARO     | Drug class                                          | Resistance mechanism    | Percentage length of reference sequence |
|-----------------------|---------|-------------------|---------------------|-----------------|---------|-----------------------------------------------------|-------------------------|-----------------------------------------|
| Scaffolds_7_107624_39 | Strict  | 761.1             | <i>adeF</i>         | 41.27           | 3000777 | fluoroquinolone antibiotic; tetracycline antibiotic | antibiotic efflux       | 99.72                                   |
| Scaffolds_25_1658_1   | Strict  | 457.6             | <i>ANT(3'')-IIa</i> | 100             | 3004089 | aminoglycoside antibiotic                           | antibiotic inactivation | 70.59                                   |

**Table S2.** One gene related to the potential drug resistance of *A. muciniphila* PROBIO detected based on the ResFinder database.

| Resistance gene | Identity | Contig or depth     | Position in contig | Phenotype                   | Accession |
|-----------------|----------|---------------------|--------------------|-----------------------------|-----------|
| <i>aadA15</i>   | 96.20    | Scaffolds_25_1658_1 | 1..685             | spectinomycin; streptomycin | DQ393783  |

**Table S3.** Genome sequence characteristics of *A. muciniphila* PROBIO.

| Sequence ID | Circular | Sequence length | GC content | A content        | T content        | G content        | C content        | N content |
|-------------|----------|-----------------|------------|------------------|------------------|------------------|------------------|-----------|
| chr         | Circular | 2,863,710       | 55.32 %    | 642,274(22.43 %) | 637,142(22.25 %) | 788,279(27.53 %) | 796,015(27.80 %) | 0(0.00 %) |
| Total       | ●        | 2,863,710       | 55.32 %    | 642,274(22.43 %) | 637,142(22.25 %) | 788,279(27.53 %) | 796,015(27.80 %) | 0(0.00 %) |

**Table S4.** A gene related to virulence factors of *A. muciniphila* PROBIO detected based on the VFD database.

| qseqid      | sseqid       | pident | length | e-value   | bitscore | description                                                   |
|-------------|--------------|--------|--------|-----------|----------|---------------------------------------------------------------|
| Scaffolds_2 | VFG046465(g  |        |        |           |          | ( <i>tufA</i> ) elongation factor Tu [EF-Tu (VF0460)]         |
| _441681_74  | b YP_169203. | 73.1   | 394    | 1.80E-177 | 616.3    | [ <i>Francisella tularensis</i> subsp. <i>tularensis</i> SCHU |
|             | 1)           |        |        |           |          | S4]                                                           |

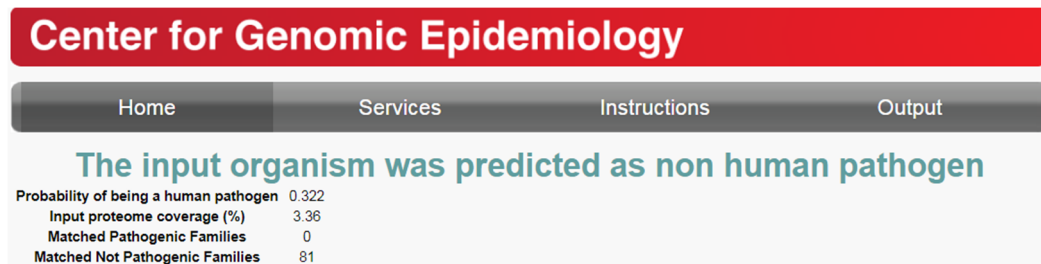

**Figure S1.** Prediction of the pathogenicity of *A. muciniphila* PROBIO.
